# Supplementary material for: Feasibility of USPIOs for T1-weighted MR molecular imaging of tumor receptors
Source: Royal Society of Chemistry journal article supplement (doi:10.1039/c7ra04903j), 2017-01-01
Supplement: c7ra04903j1.pdf [file c7ra04903j1.pdf]

## Supplementary Information:

### Determination of $r_1$ and $r_2$ relaxivities with 3 T MRI scanner:

To determine the relaxivities of the USPIOs using a 3T MRI scanner (TrioTim, Siemens, Germany), the particles were dispersed in deionized water in plastic vials. To avoid susceptibility artefacts from the surrounding air in the scans, all the samples were placed in a water-containing plastic container at room temperature. For the determination of the  $T_2$  relaxation times, a clinical head coil and CPMG sequence were used with the following parameters: TR = 2000 ms; TE = 30-960 ms, 32 echoes; FOV = 100 mm; Matrix =  $192 \times 192$ ; Slice thickness = 2 mm; Average 3. The relaxation times were calculated by a linear fit of the logarithmic region-of-interest signal amplitudes versus TE.  $T_1$  relaxation times were obtained using an inverse saturation recovery sequence with different inversion times: TR = 500 ms; TE = 15 ms; Average 3; FOV = 100 mm; Matrix =  $192 \times 192$ ; Slice thickness = 2 mm; Inversion time = 10 – 1000 ms.

**Table S1 Relaxivities of USPIOs at different steps of probe preparation**

| Magnetic field (T) | Relaxivity ( $\text{mM}^{-1}\text{s}^{-1}$ ) | PAA@USPIOs | After PEG modification | After RGD conjugation | RGD-Tc-PAA@USPIOs |
|--------------------|----------------------------------------------|------------|------------------------|-----------------------|-------------------|
| 1.41               | $r_1$                                        | 8.67       | 9.12                   | 8.92                  | 9.34              |
|                    | $r_2$                                        | 25.36      | 24.87                  | 25.11                 | 24.64             |
| 3                  | $r_1$                                        | 7.55       | 7.46                   | 7.44                  | 7.42              |
|                    | $r_2$                                        | 32.81      | 33.52                  | 32.90                 | 32.14             |
